# Supplementary material
Source: bioRxiv or medRxiv preprint supplement (https://www.biorxiv.org/content/biorxiv/early/2021/10/10/2021.06.28.450168/DC1/embed/media-1.pdf)
Supplement: Supplementary file [file media-1.pdf]

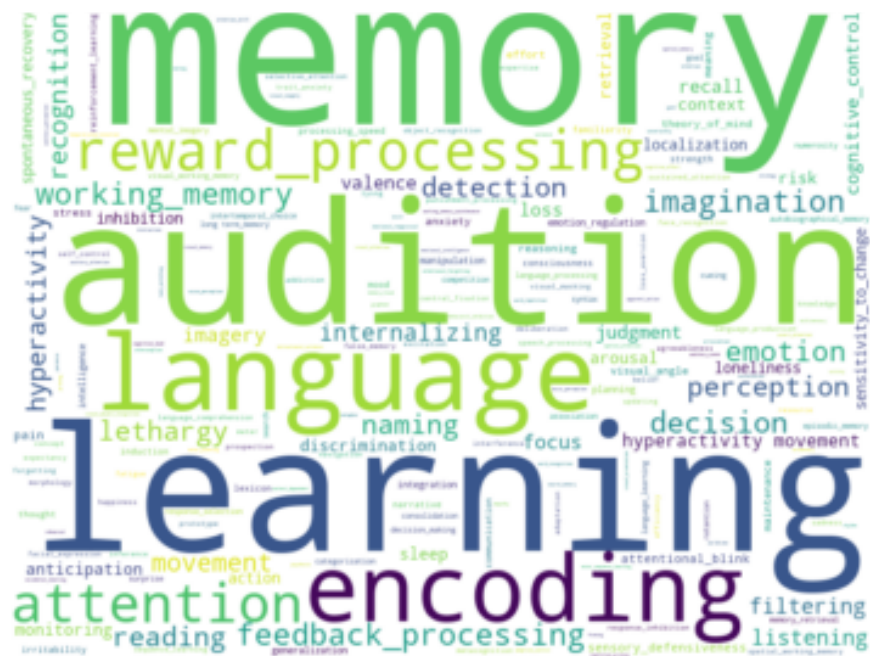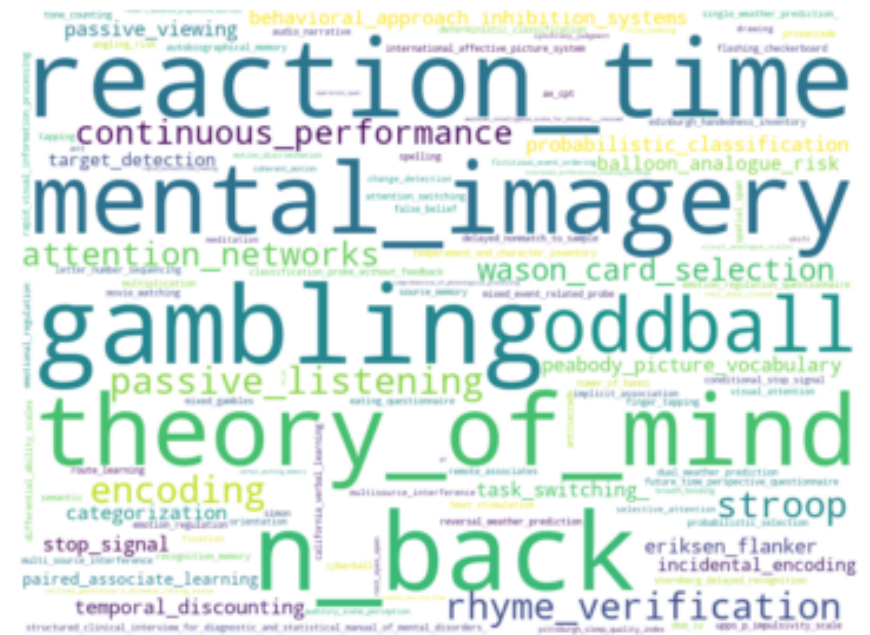

Supplementary Figure 1. Word clouds based on Cognitive Atlas terms for psychological concepts (top) and tasks (bottom) identified from titles and README files associated with OpenNeuro datasets.
